# Supplementary material for: Diacylglycerol kinase ζ controls diacylglycerol metabolism at the immunological synapse
Source: PubMed Central journal article supplement — Mol Biol Cell. 2011 Nov 15;22(22):4406–14. doi: 10.1091/mbc.E11-03-0247 (PMC3216665; doi:10.1091/mbc.e11-03-0247), 2011-11-15
Supplement: supp_E11-03-0247_CombinedSupplemental_271011.pdf [file supp_E11-03-0247_CombinedSupplemental_271011.pdf]

## Supporting Information

Gharbi et al.

### Supplemental figure legends

**Figure S1. DGK $\alpha$  lipid kinase assay at the TCR complex.** RNAi was used to silence DGK $\alpha$  and DGK $\zeta$ ; at 72 h post-treatment, cells ( $10^7$  cells/ml) were starved as in Figure 1B and stimulated with anti-CD3/CD28 beads for various times. TCR-bound samples were used as an enzyme source for the DAG kinase assay, using optimum conditions to measure DGK $\alpha$  activity (assay II), as described in method section. PA production is represented as arbitrary units. The TCL fraction was analyzed by WB to confirm RNAi efficiency and activation (B).

**Figure S2. Ectopically expressed DGK $\zeta$  is recruited to the TCR complex after triggering and does not alter recruitment of endogenous DGK $\zeta$ .** (A) GFP-DGK $\zeta$  chimera or GFP alone were transiently expressed in Jurkat T cells. At 24 h post-transfection, cells were collected, serum-starved, and TCR-bound complex isolated using anti-CD3/CD28-coated beads. Associated proteins were analyzed by WB and transfected constructs detected using anti-GFP antibody (top). Ectopic DGK $\zeta$  expression was measured in parallel in total cell lysate (TCL). Ectopic DGK $\zeta$  was enriched in the activated TCR immune complex compared to controls, at a level similar to that of endogenous DGK $\zeta$ . GFP-DGK $\zeta$  overexpression did not compete with endogenous DGK $\zeta$ , which was still recruited to the active TCR. As an additional control, GFP alone did not associate to the pulldown complex in any conditions tested. (B,C) Jurkat T cells were transiently transfected with the GFP-DGK $\zeta$  fusion protein and stimulated either with CD3/CD28-coated beads or with SEE-loaded antigen presenting cells (B and C respectively). (B) Bead-treated cells were incubated for 20 minutes and fixed with paraformaldehyde for immunofluorescence analysis. GFP-DGK $\zeta$  was monitored and compared to actin cytoskeleton (Phalloidin-Rhodamine, red). Representative images are shown, Bar= 5  $\mu$ m. (C) For cells activated with SEE-loaded APC, translocation dynamics were monitored by time-lapse microscopy (see Fig. 3B).

**Figure S3. GFP-DGK $\zeta$  translocates to the PM following T cell/APC presentation and MARCKS domain phosphorylation is required.** (A) Structure and graphic representation of DGK $\zeta$  fused to GFP and the mutants used in assays. (B) Jurkat T cells were transiently transfected with the fusion protein GFP-DGK $\zeta$  WT or mutated in the MARCKS domain (SD or SA, SA- $\Delta$ Ank). At maximal construct expression, T cells were collected in HBSS/2% FBS and DGK $\zeta$  translocation was followed by time-lapse fluorescence microscopy after stimulation with Raji B cells alone or pulsed with 1  $\mu$ g/ml SEE (\*). After 15 min incubation with APC, live images were captured on an Olympus confocal microscope. Representative images are shown. Bar = 5  $\mu$ m. Truncation of the C-terminal region reverses the negative restriction caused by Ser-to-Ala mutation, and the SA- $\Delta$ Ank mutant translocated to the PM in response to SEE presentation. (C) GFP-DGK $\zeta$

(green) was transiently transfected into Jurkat T cells and translocation tracked in live cells presented to SEE-pulsed Raji B cells (blue). When stated, Jurkat T cells were preincubated with 50 or 100 nM BIM or 6  $\mu$ M rottlerin. Representative images are shown (left); graph showing subcellular distribution (right); PM: plasma membrane, V: vesicular, C: cytosol, C/V: cytosol and vesicular, PM/V: plasma membrane and vesicular.

**Figure S4. Co-expression of Cherry-C1ab and different DGK constructs in basal condition, prior to antigen presentation.** Jurkat T cells were transfected with the tandem C1 domain of PKC $\theta$  fused to Cherry (Cherry-C1ab), alone or cotransfected with GFP-tagged constructs of DGK $\alpha$  or  $\zeta$  wild type (WT) or mutated. Representative images are shown prior to antigen presentation. Bar = 5  $\mu$ m.

### **Supplemental Movie legends**

**Movie 1.** Time-lapse videomicroscopy of GFP-DGK $\zeta$  translocation after antigen presentation by SEE-pulsed B cells.

**Movie 2 (a, b):** Time-lapse videomicroscopy of GFP-DGK $\zeta$  and actin-cherry translocation after antigen presentation by SEE-pulsed B cells.

**Movie 3.** Time-lapse videomicroscopy of the PKC $\theta$  C1 tandem domain (C1ab) fused to the cherry fluorescent protein (Cherry C1ab). DAG pool formation (red) and accumulation at the IS after antigen presentation by SEE-pulsed B cells.

**Movie 4.** Time-lapse videomicroscopy of Jurkat T cells cotransfected with Cherry-C1ab (DAG pool, red) and GFP-DGK $\zeta$  (green) after antigen presentation by SEE-pulsed B cells.

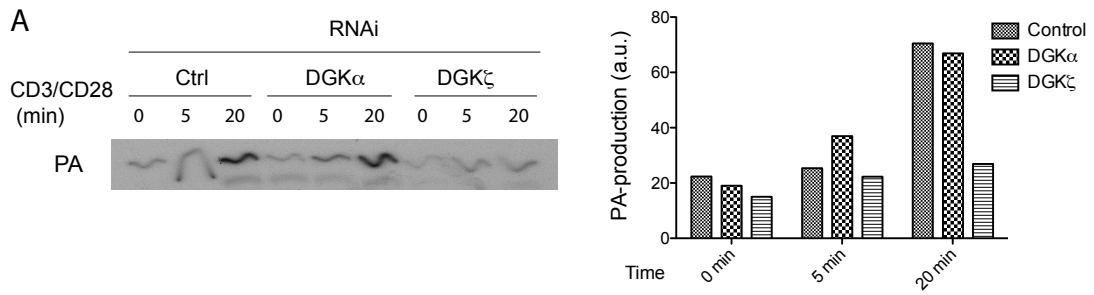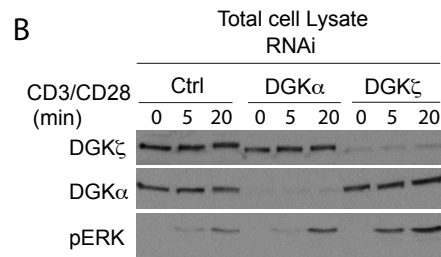

Figure S1

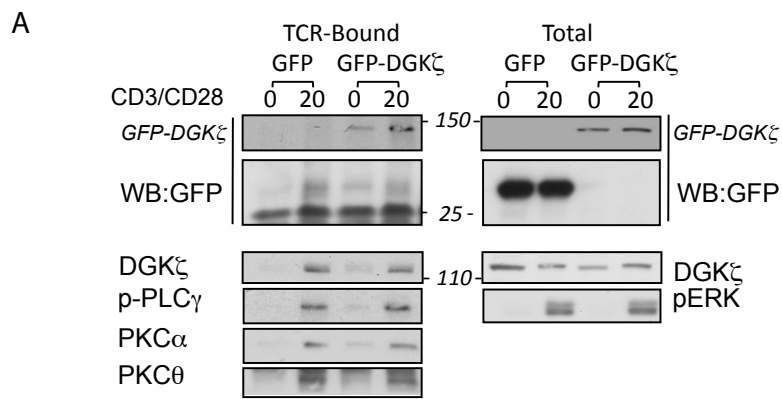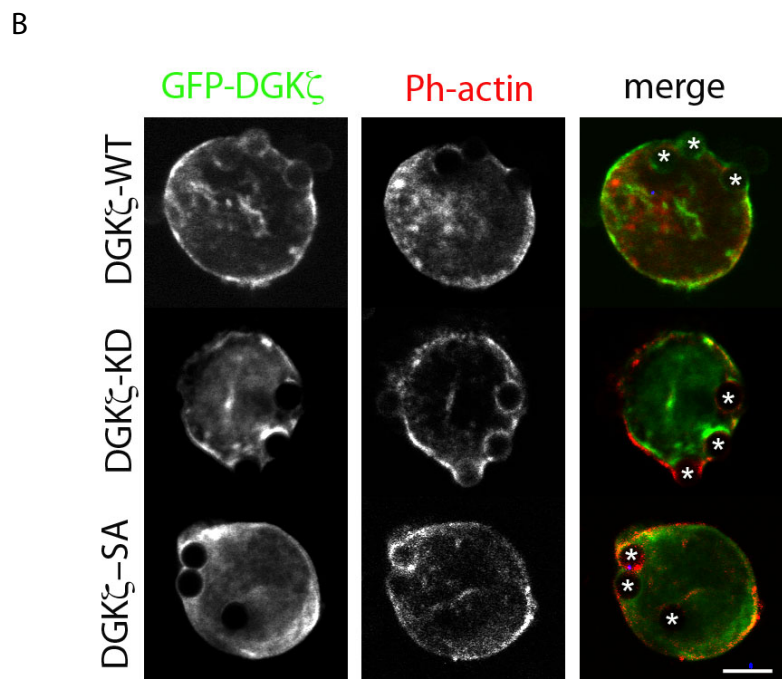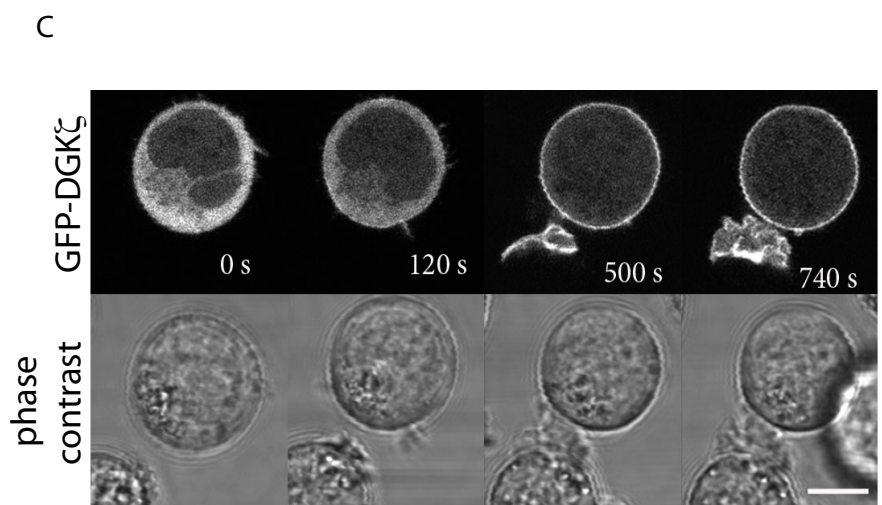

Figure S2

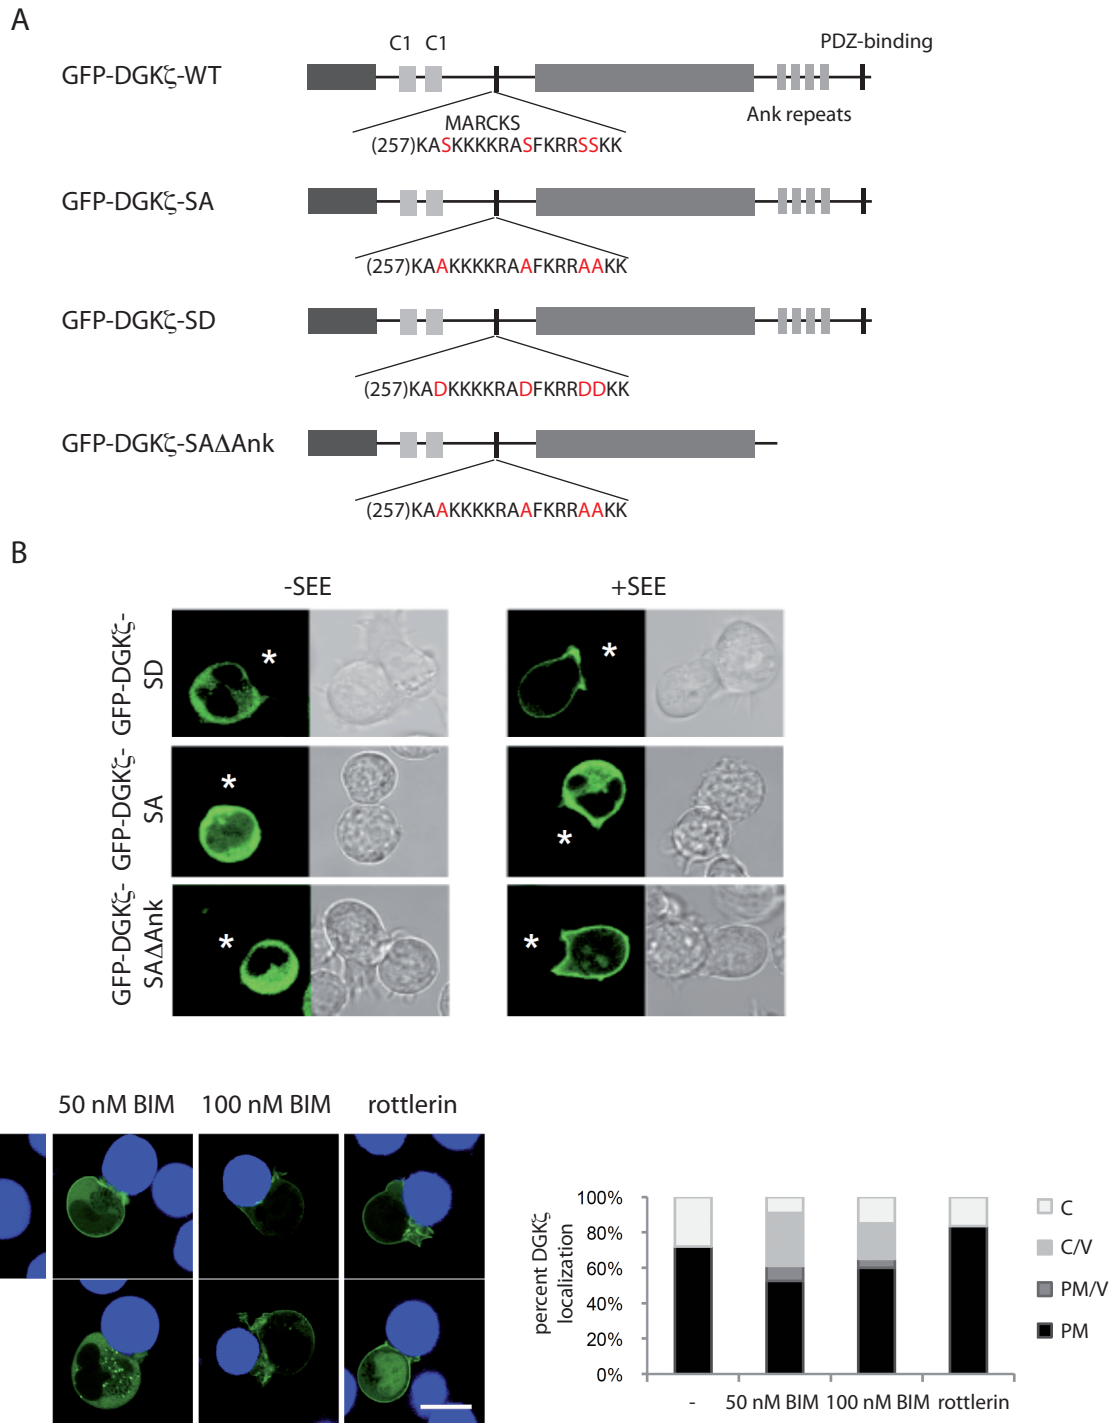

Figure S3

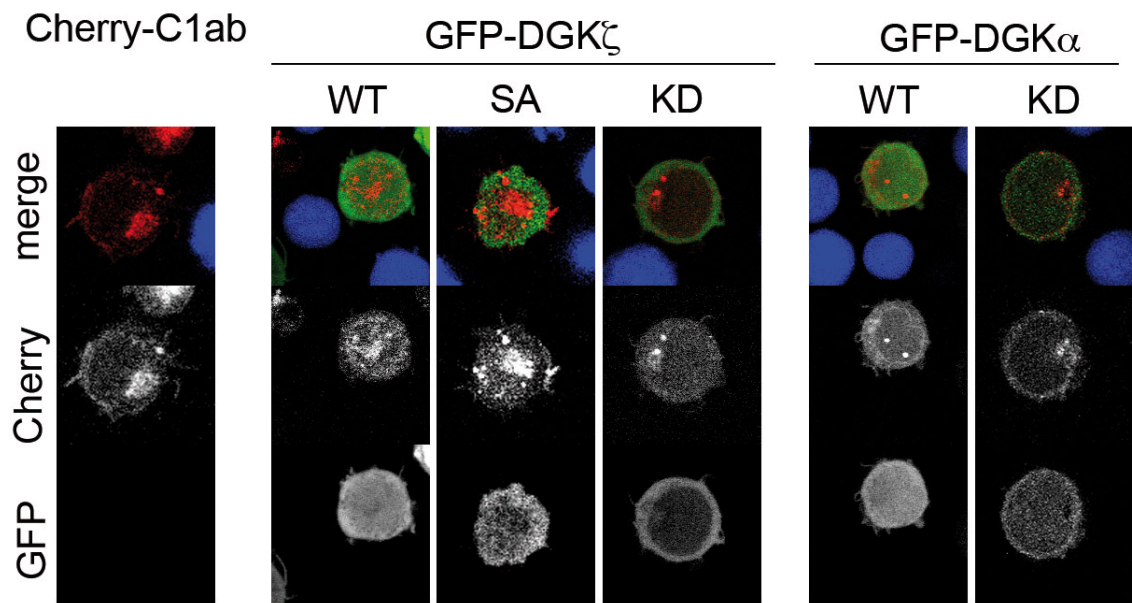

Figure S4
